# Supplementary material for: Chiral and achiral imidazole-linked tetrahedral zinc phosphonate frameworks with photoluminescent properties
Source: Royal Society of Chemistry journal article supplement (doi:10.1039/c3dt52159a), 2013-09-17
Supplement: c3dt52159a.pdf [file c3dt52159a.pdf]

# **Chiral and Achiral Imidazole-linked Tetrahedral Zinc Phosphonate Frameworks with Photoluminescent Properties**

Xiu-Ling Zhang,<sup>a,b</sup> Kai Cheng,<sup>a,b,c</sup> Fei Wang,<sup>a</sup> and Jian Zhang\*,<sup>a</sup>

<sup>a</sup>State Key Laboratory of Structural Chemistry, Fujian Institute of Research on the Structure of Matter, Chinese Academy of Sciences, Fuzhou, Fujian 350002, P. R. China.

<sup>b</sup>Key Laboratory of Coordination Chemistry and Functional Materials in Universities of Shandong, Dezhou University, Dezhou, Shandong 253023, P. R. China.

<sup>c</sup>School of Chemistry and Pharmaceutical Engineering, Shandong Polytechnic University, Ji Nan, 250353, P. R. China.

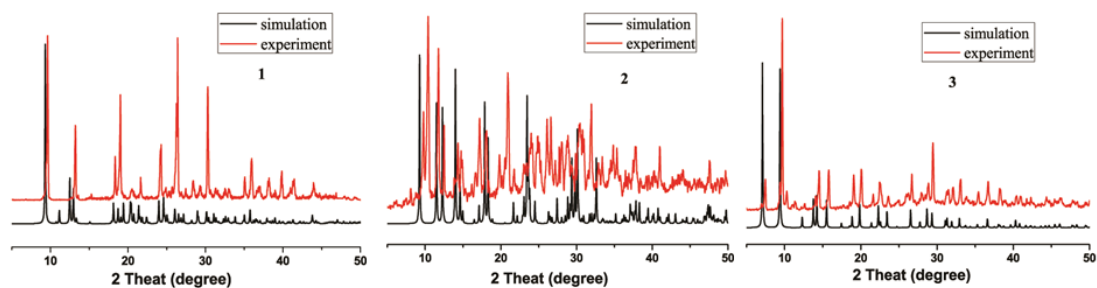

**Figure S1.** XRD patterns for compounds **1-3**.

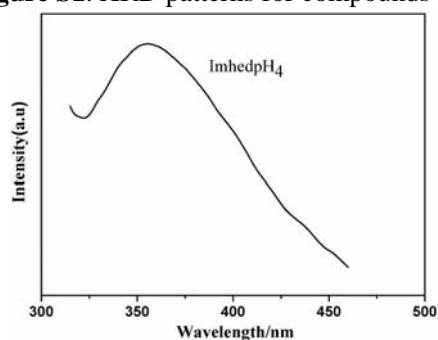

**Figure S2.** Solid-state emission spectra of imhedpH<sub>4</sub> at room temperature.

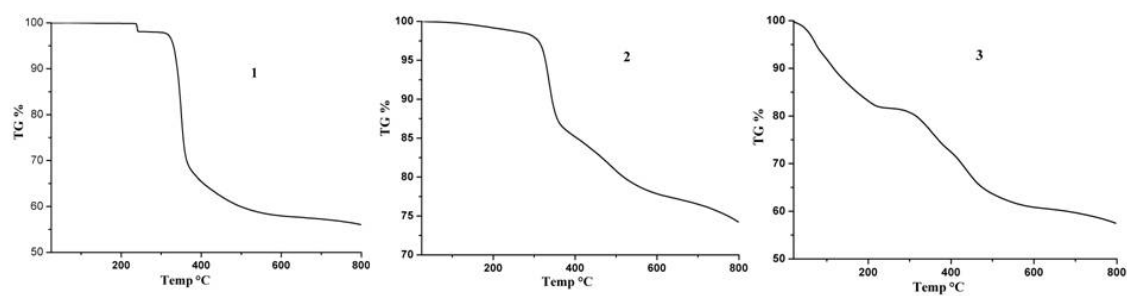

**Figure S3.** TG curves for compounds **1-3**.
